# Supplementary material for: A physically based framework for modeling the organic fractionation of sea spray aerosol from bubble film Langmuir equilibria
Source: Copernicus journal article supplement (doi:10.5194/acp-14-13601-2014), 2014-12-19
Supplement: Supplementary file 1 [file acp-14-13601-2014-supplement.pdf]

Supplement of Atmos. Chem. Phys., 14, 13601–13629, 2014  
<http://www.atmos-chem-phys.net/14/13601/2014/>  
doi:10.5194/acp-14-13601-2014-supplement  
© Author(s) 2014. CC Attribution 3.0 License.

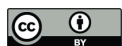

*Supplement of*

## **A physically based framework for modeling the organic fractionation of sea spray aerosol from bubble film Langmuir equilibria**

**S. M. Burrows et al.**

*Correspondence to:* S. M. Burrows ([susannah.burrows@pnnl.gov](mailto:susannah.burrows@pnnl.gov))

(a) Lipid-like mixture

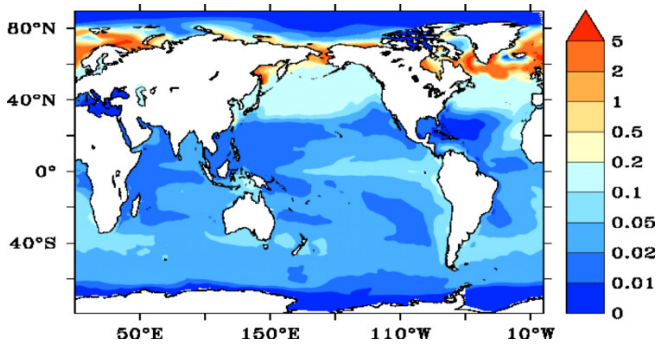

(b) Polysaccharide-like mixture

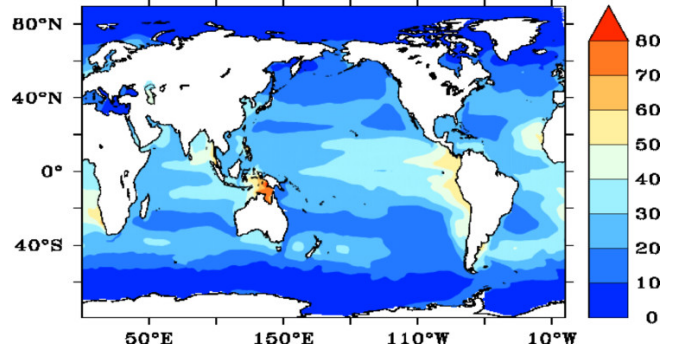

(c) Protein-like mixture

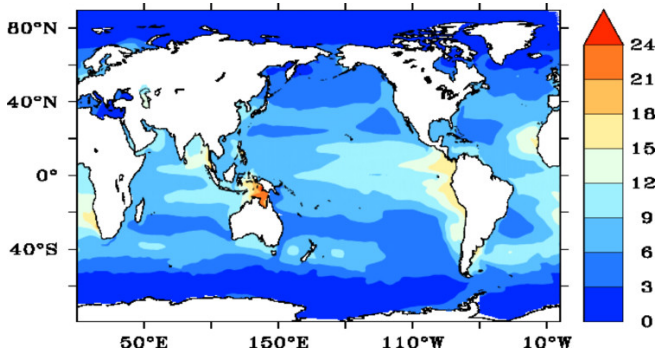

(d) Processed mixture

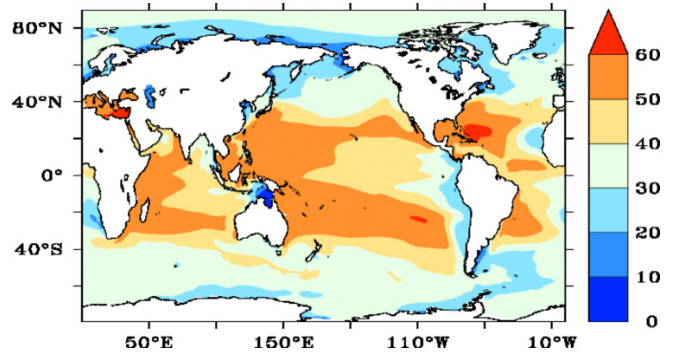

(e) Deep abyssal humic-like mixture

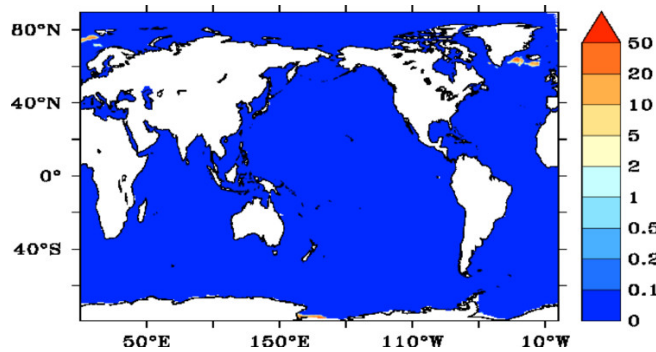

Figure 1: Ocean concentration of each compound class [ $\mu\text{mol L}^{-1}$ ], May.

(a) Lipid-like mixture

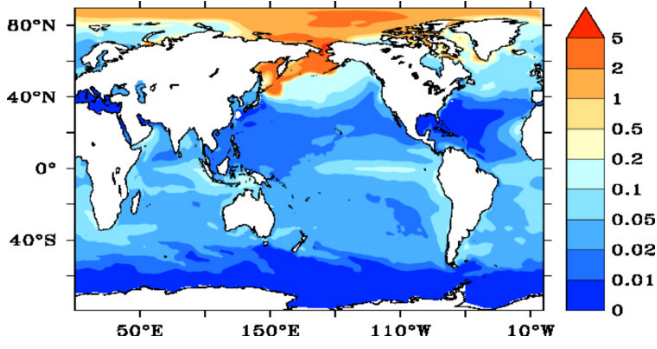

(b) Polysaccharide-like mixture

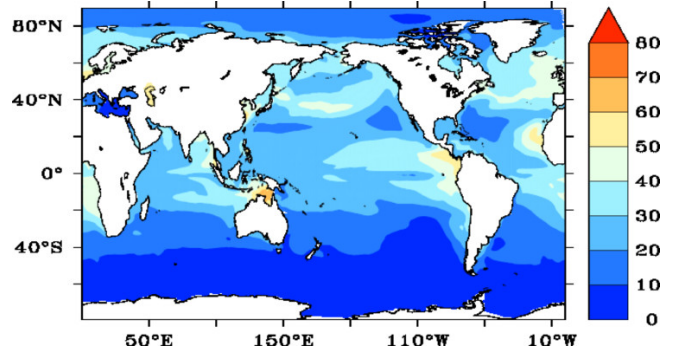

(c) Protein-like mixture

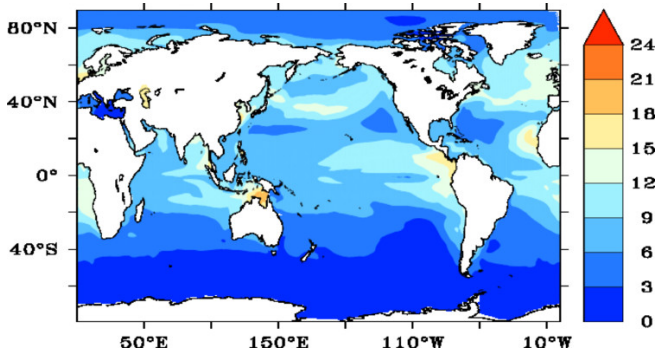

(d) Processed mixture

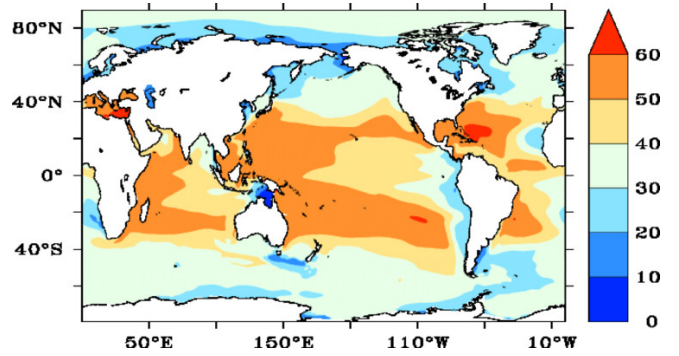

(e) Deep abyssal humic-like mixture

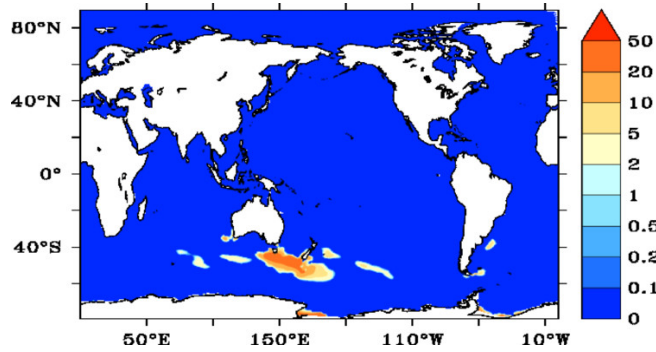

Figure 2: Ocean concentration of each compound class [ $\mu\text{mol L}^{-1}$ ], August.

(a) Lipid-like mixture

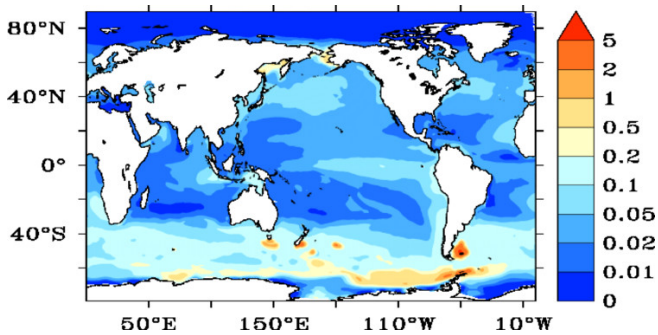

(b) Polysaccharide-like mixture

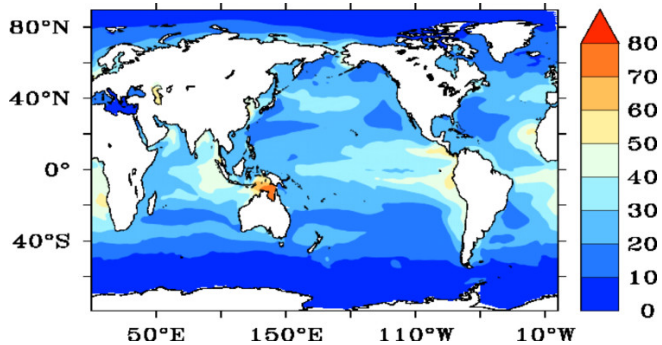

(c) Protein-like mixture

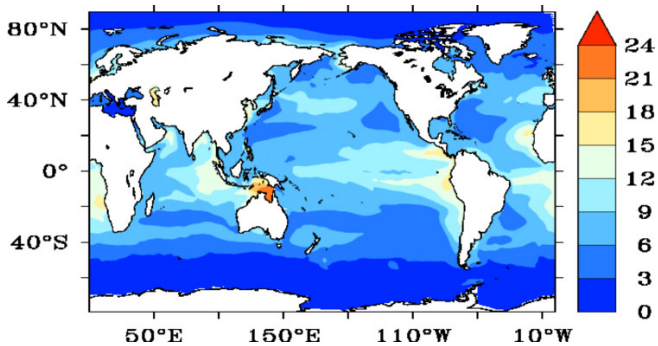

(d) Processed mixture

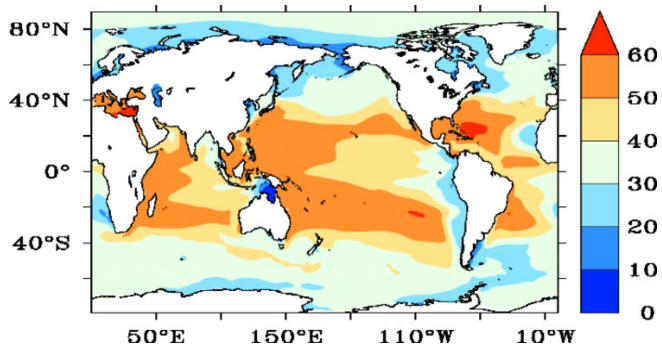

(e) Deep abyssal humic-like mixture

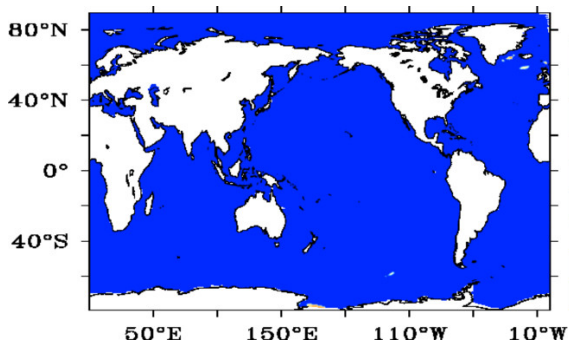

Figure 3: Ocean concentration of each compound class [ $\mu\text{mol L}^{-1}$ ], November.



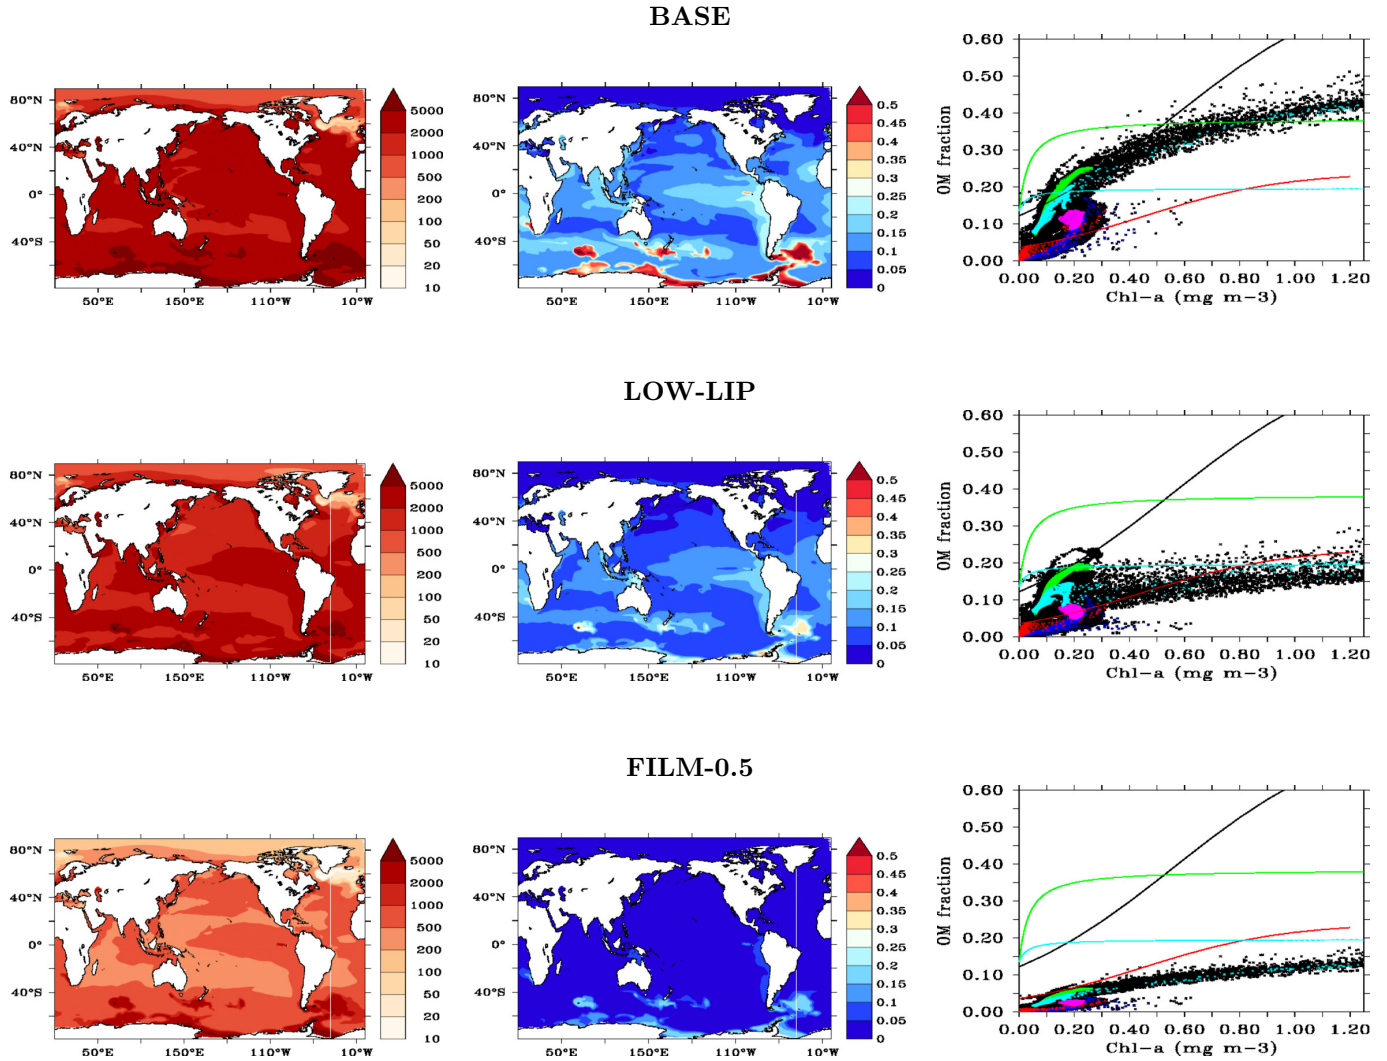

Figure 4: Global estimates of effective enrichment, organic mass fractions, and chl-vs-OM fraction relationship, February. Top: BASE case: using model compounds as described in Table 1 of main paper. Middle: Case LOW-LIP: using model compounds as described in Table 1 of main paper, but with  $\alpha_{lip}$  decreased by a factor of ten. Bottom: Case FILM-0.5: using model compounds as described in Table 1 of main paper, but with  $l_{bub} = 0.5 \mu\text{m}$ .

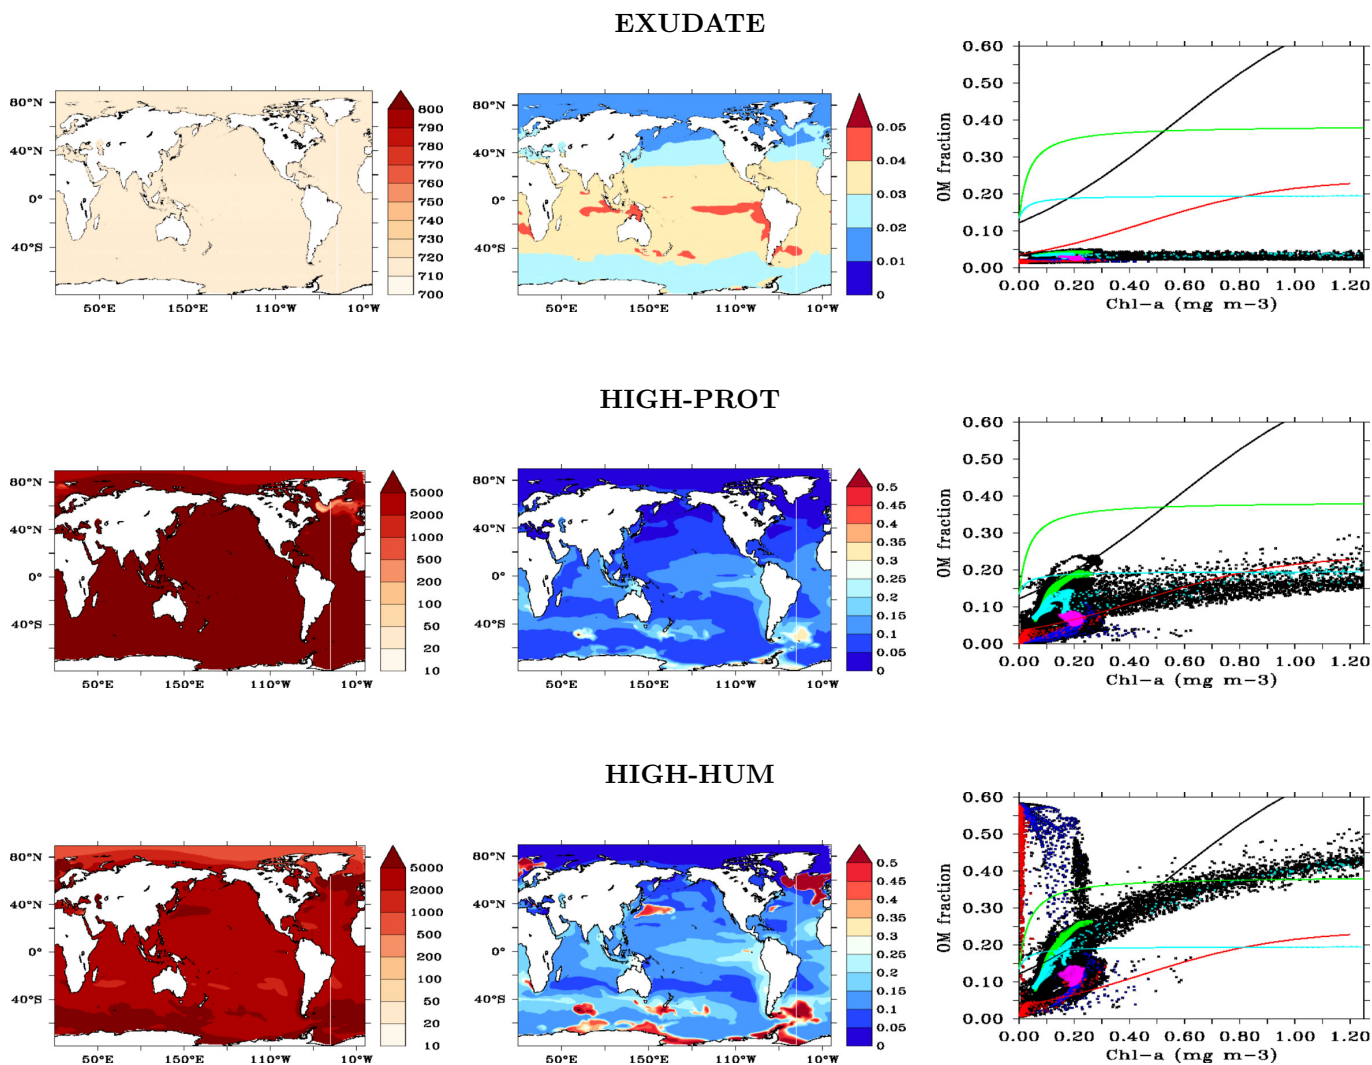

Figure 5: Global estimates of organic mass fraction in nascent film drops – sensitivity cases (February). Top: Case EXUDATE: using empirical constants derived from phytoplankton exudates [Fuentes *et al.*, 2011], with the same physical constants applied to all five compound classes. Middle: Case HIGH-PROT: using model compounds as described in Table 1 of main paper, but with  $\alpha_{\text{prot}}$  for casein (ten times larger value). Bottom: Case HIGH-HUM: using model compounds as described in Table 1 of main paper, but with  $\alpha_{\text{humic}} \times 10^4$ .

(a) BASE case

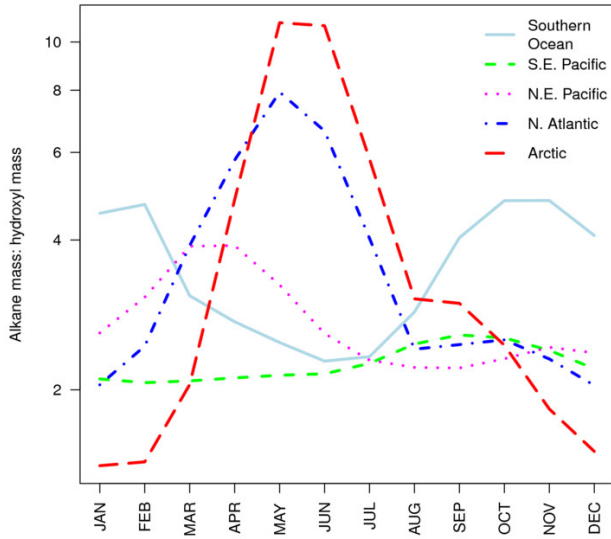

(b) LOW-LIP+HIGH-POLY case

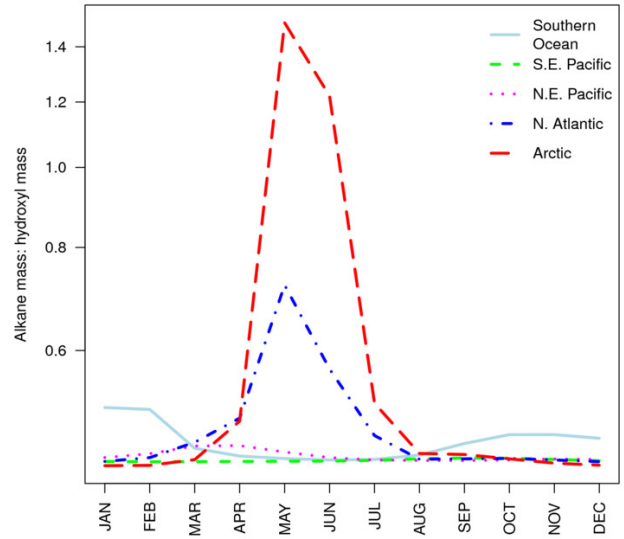

(c) BASE case

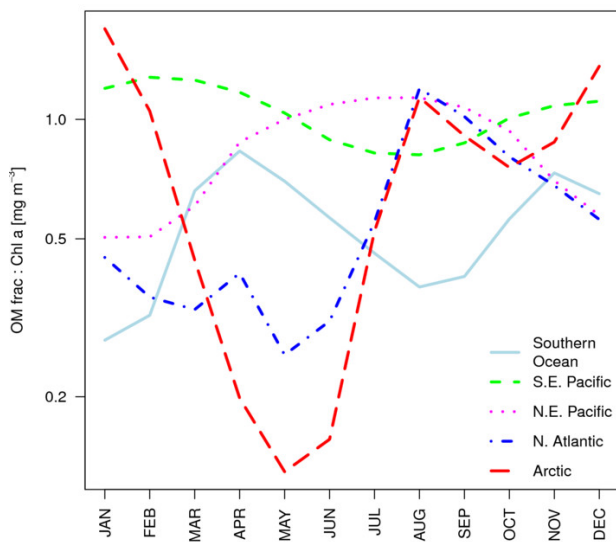

(d) LOW-LIP+HIGH-POLY case

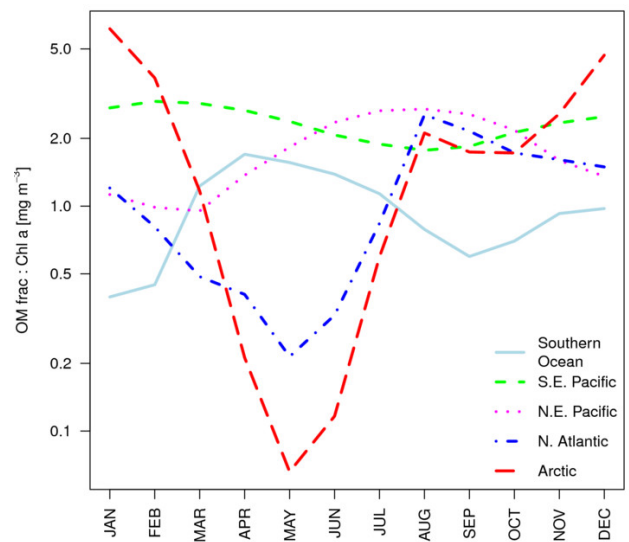

Figure 6: Seasonal cycle of the alkane-to-hydroxyl ratio as estimated from model monthly mean submicron SSA composition. Organic classes were averaged over the regions shown in Fig. 9 and converted to estimated functional group masses using the conversions indicated in Tab. 4.
